# Supplementary material for: Charge-transfer interactions for the fabrication of multifunctional viral nanoparticles
Source: Royal Society of Chemistry journal article supplement (doi:10.1039/c4cc05195e), 2014-01-01
Supplement: c4cc05195e1.pdf [file c4cc05195e1.pdf]

# Charge-Transfer Interactions for the Fabrication of Multifunctional Viral Nanoparticles

Jun Hu,<sup>a,b†</sup> Peiyi Wang,<sup>c†</sup> Xia Zhao,<sup>a</sup> Lin Lv,<sup>b</sup> Song Yang,<sup>c</sup> Baoan Song<sup>c\*</sup> and Qian Wang<sup>b\*</sup>

<sup>a</sup>State Key Lab of Polymer Physics and Chemistry, Changchun Institute of Applied Chemistry, Chinese Academy of Sciences, Changchun, 130022, China

<sup>b</sup>Department of Chemistry and Biochemistry, University of South Carolina, Columbia, SC 29208, USA; E-mail: wang263@mailbox.sc.edu

<sup>c</sup>State Key Lab Breeding Base of Green Pesticide & Agricultural Bioengineering Centre for R&D of Fine Chemicals, Guizhou University, Guiyang, 550025, China; E-mail: songbaoan22@yahoo.com

## CONTENTS:

|                                                                                               |    |
|-----------------------------------------------------------------------------------------------|----|
| 1. Materials.....                                                                             | 2  |
| 2. Measurements.....                                                                          | 2  |
| 3. Synthesis of <b>PYR-Azide, DNB, DDNB, DNB-Polyhema, MV, TV, and 2-AP</b>                   |    |
| 3.1 2-(2-(2-(2-azidoethoxy)ethoxy)ethoxy)ethyl pyrene-1-carboxylate ( <b>PYR-Azide</b> )..... | 3  |
| 3.2 2-hydroxyethyl-3, 5-dinitrobenzoate ( <b>DNB</b> ).....                                   | 4  |
| 3.3 ethane-1, 2-diyl bis(3, 5-dinitrobenzoate) ( <b>DDNB</b> ).....                           | 4  |
| 3.4 DNB-poly(2-hydroxyethyl methacrylate) ( <b>DNB-Polyhema</b> ).....                        | 5  |
| 3.5 1, 1'-dimethyl-[4, 4'-bipyridine]-1, 1'-dium ( <b>MV</b> ).....                           | 5  |
| 3.6 1-methyl-1'-tetradecyl-[4, 4'-bipyridine]-1, 1'-dium ( <b>TV</b> ).....                   | 5  |
| 3.7 1-[11-(2-anthracenylmethoxy)-11-oxoundecyl]pyridinium bromide ( <b>2-AP</b> ).....        | 6  |
| 4. Preparation of <b>TMV (wt)-Alkyne</b> and <b>TMV (wt)-PYR</b>                              |    |
| 4.1 <b>TMV (wt)-Alkyne</b> .....                                                              | 6  |
| 4.2 <b>TMV (wt)-PYR</b> .....                                                                 | 7  |
| 5. Figure S1-S27 .....                                                                        | 8  |
| 6. Reference.....                                                                             | 19 |

## 1. Materials

Pyrene acid, 2,2'-((oxybis(ethane-2,1-diyl))bis(oxy))diethanol, N-(3-dimethylamino propyl)-N'-ethylcarbodiimide hydrochloride (EDC·HCl), 4-dimethylaminopyridine (DMAP), *p*-toluenesulfonyl chloride, sodium azide (NaN<sub>3</sub>), 3-aminophenylacetylene, copper sulfate pentahydrate (CuSO<sub>4</sub>·5H<sub>2</sub>O), sodium ascorbate (NaAsc), Poly(2-hydroxyethyl methacrylate) (Phema, MW 20000 Da), 3,5-dinitrobenzoyl chloride, ethylene glycol, 4,4'-bipyridine, triethylamine, methyl iodide, 1-bromotetradecane and other reagents were local commercial products and used as received. All organic solvents were dried and distilled before used.

## 2. Measurements

NMR spectra were characterized on a Varian Mercury 300/400 apparatus spectrometer using CDCl<sub>3</sub> or DMSO-*d*<sub>6</sub> as solvent; UV-Vis spectra were acquired on Agilent Technologies 95-03 spectrometers; Fluorescence spectra were measured on Varian Cary Eclipse spectrometers, for the Job's plot experiments: a guest molecule with various concentrations was added into **TMV (wt)-PYR** aqueous (2 mL, 0.125 mg/mL). The molar ratio of **TMV (wt)-PYR** subunits  $\{x = [\text{TMV(wt)-PYR}] / ([\text{TMV(wt)-PYR}] + [\text{guest molecule}])\}$  varies from 0 to 1. After incubating for 10 min, the changes of the fluorescence intensity ( $\Delta I$ ) of each sample at 417 nm (the fluorescence intensity of **TMV(wt)-PYR** subtracts the one of CT-complex (**TMV(wt)-PYR**/guest molecule) were recorded when the molar ratio is changed; ESI-MS spectra were recorded using a Micromass QTOF apparatus; MALDI-TOF MS analysis was performed using a Bruker Ultraflex I TOF/TOF mass spectrometer, for sample preparation: the virus (24  $\mu$ L) was denatured by adding guanidine hydrochloride (6  $\mu$ L, 6 M), and then the denatured proteins were spotted on MTP 384 massive target plate using Millipore Zip-Tips $\mu$ C18 tips which can remove the excess salts and assist the binding of protein to the sinapic acid matrix; Transmission electron microscopy (TEM) measurements were carried out on a Hitachi H8000 electron microscope operating at an acceleration voltage of 120 kV, for sample preparation: samples

were prepared by drop-casting the aqueous solution on the carbon-coated copper grid, and then were negatively stained with a uranyl acetate solution; Size Exclusion Chromatography (SEC) analysis was performed on an AKTA explorer (GE Biotech) instrument using Sephadex G-25 column and Superose-6 size-exclusion column, for the analysis procedure: 100  $\mu$ L viruses sample (conc. 1 mg/mL) were injected into FPLC with 10 mM Kphos as the buffer (pH=7.8) at the flow rate 0.4 mL/min, and the signal was monitored at the absorbance of 260 nm; Dynamic Light Scattering (DLS) was performed by Malvern Zetasizer Nano-ZS; Sodium dodecyl sulfate polyacrylamide gel electrophoresis (SDS-PAGE) was prepared in house with 12% acrylamide separating gel (30:1 acrylamide to bisacrylamide) with 5% acrylamide stacking gel.

### 3. Synthesis of PYR-Azide and DNB derivatives

#### 3.1 Synthesis of PYR-Azide

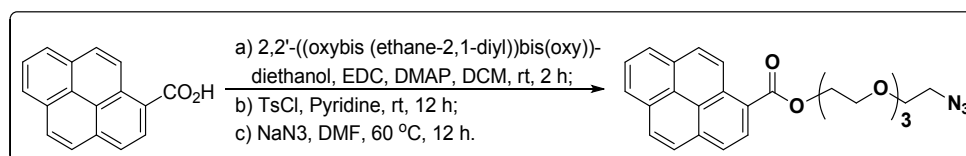

A solution of pyrene acid (0.5 g, 2.03 mmol), EDC (1.16 g, 6.09 mmol) and DMAP (0.74 g, 6.09 mmol) in 5 mL anhydrous DCM was added dropwise to the solution of 2,2'-((oxybis(ethane-2,1-diyl))bis(oxy))diethanol in 5 mL dry DCM. After the addition, the mixture was stirred at room temperature for 2 h. The solvent was removed under reduced pressure, and re-dissolved by ethyl acetate. The organic layer was washed by water, brine, dried with sodium sulfate and filtered, followed by the removal of the solvents under vacuum. Then the crude product and *p*-toluenesulfonyl chloride (0.20 g, 1.05 mmol) were added in 2 mL pyridine, and the mixture was stirred at room temperature for 12 h. The solvent was removed under reduced pressure, and re-dissolved by DCM. The organic layer was washed by water, brine, dried with sodium sulfate and filtered, followed by the removal of the solvent under vacuum to afford a brown liquid. The brown liquid and sodium azide (0.23 g, 3.38 mmol) were dissolved in 4 mL DMF, and the mixture was stirred at 60 °C for 12 h. After that, ethyl acetate

was added to the reaction solution, washed by saturated  $\text{NH}_4\text{Cl}$  solution, and the organic layer was dried with sodium sulfate, filtered, followed by the removal of the solvent under reduced pressure. The residue was purified using silica gel column chromatography with  $v(\text{DCM}): v(\text{methanol}) = 50:1$  to afford Pyrene-Azide, the brown liquid, 95 mg. ESI-MS (+):  $m/z$  448  $[\text{M} + \text{H}]^+$ , 465  $[\text{M} + \text{NH}_4]^+$ ; HRMS (ESI):  $m/z$  calcd for  $\text{C}_{25}\text{H}_{25}\text{N}_3\text{O}_5$ : 447.1794; found: 447.1787;  $^1\text{H}$  NMR (300 MHz,  $\text{CDCl}_3$ , ppm):  $\delta$  9.27 (1H, d,  $J = 9.30$  Hz, pyrene-H), 8.66 (1H, d,  $J = 8.1$  Hz, pyrene-H), 8.15 (7H, m, pyrene-H), 4.67 (2H, t,  $J = 4.5$  Hz,  $\text{CH}_2$ ), 3.97 (2H, t,  $J = 5.1$  Hz,  $\text{CH}_2$ ), 3.69 (10H, m,  $\text{CH}_2$ ), 3.31 (2H, t,  $J = 5.1$  Hz,  $\text{CH}_2$ );  $^{13}\text{C}$  NMR (75 MHz,  $\text{CDCl}_3$ , ppm):  $\delta$  168.0, 134.4, 131.2, 131.1, 130.4, 129.7, 129.5, 128.6, 128.3, 127.2, 126.4, 126.4, 126.3, 125.0, 124.9, 124.2, 123.6, 70.9, 70.8, 70.8, 70.1, 69.4, 64.4, 50.7.

### 3.2 Synthesis of DNB

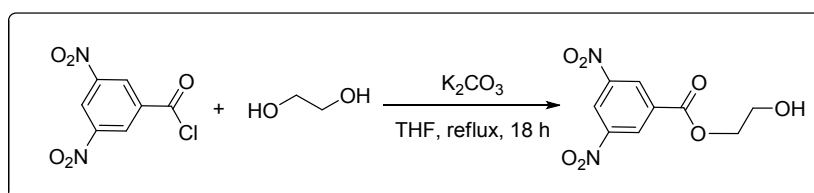

The synthesis of DNB was carried out as ref[1] to give a white powder. EI-MS (+):  $m/z = 257$   $[\text{M} + \text{H}]^+$ ;  $^1\text{H}$  NMR (300 MHz, DMSO, ppm):  $\delta$  9.04 (1H, s, ph-H), 8.97 (2H, s, ph-H), 5.09 (1H, s, OH), 4.40 (2H, m,  $\text{phCO}_2\text{CH}_2$ ), 3.75 (2H, m,  $\text{CH}_2$ );  $^{13}\text{C}$  NMR (75 MHz, DMSO, ppm):  $\delta$  163.1, 148.8, 133.2, 129.4, 122.9, 68.7, 59.2.

### 3.3 Synthesis of DDNB

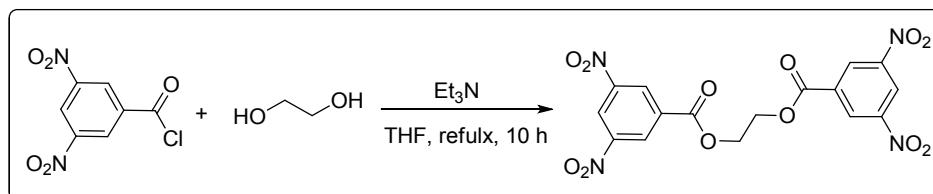

The synthesis of DDNB was carried out as ref[1] to a white powder. EI-MS (+):  $m/z = 468$   $[\text{M} + \text{NH}_4]^+$ ;  $^1\text{H}$  NMR (DMSO, 300 MHz, ppm):  $\delta$  9.04 (2H, s, ph-H), 8.94 (4H, s, ph-H), 4.83 (4H, s,  $\text{CO}_2\text{CH}_2$ );  $^{13}\text{C}$  NMR (DMSO, 75 MHz, ppm):  $\delta$  162.1 (2C,  $\text{phCO}_2\text{CH}_2$ ), 148.1, 131.9, 128.4, 122.2 (12C, ph-C), 63.6 (2C,  $\text{phCO}_2\text{CH}_2$ ).

### 3.4 Synthesis of DNB-Polyhema

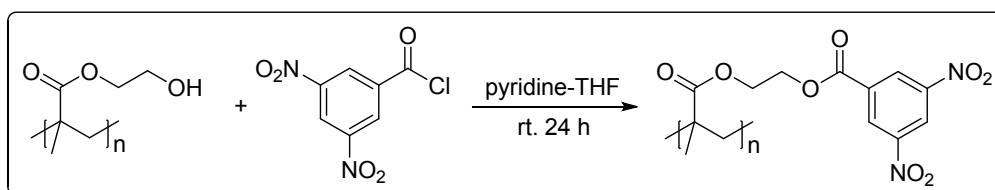

Poly(2-hydroxyethyl methacrylate) (polyhema, MW 20K, 0.13 g, 1.0 mmol -OH equiv.) and 3, 5-dinitrobenzoyl chloride (0.27 g, 1.2 mmol) were dissolved in 6 mL mixed solvent of THF-pyridine (2:1, volume ratio). After stirring at room temperature for 24 h, the solvent was removed under reduced pressure, and the crude mixture was re-dissolved in DCM. The organic layer was washed by water, brine, and dried with anhydrous sodium sulfate. The solution was concentrated under reduced pressure until the final volume reached 1 mL, and then was added dropwise to cold ethyl ether, affording a white solid, 120 mg, yield 37 %.  $^1\text{H}$  NMR (DMSO, 300 MHz, ppm):  $\delta$  8.99 (1H, s, ph-H), 8.83 (2H, s, ph-H), 4.42 (2H, s, OCH<sub>2</sub>), 4.09 (2H, s, OCH<sub>2</sub>), 0.57-1.19 (5H, m).

### 3.5 Synthesis of MV

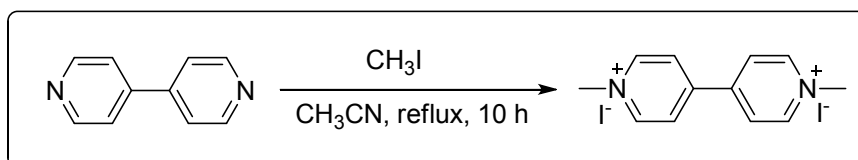

The synthesis was carried as ref[2] to give a red powder. EI-MS (+):  $m/z$  = 186 ;  $^1\text{H}$  NMR (DMSO, 300 MHz, ppm):  $\delta$  9.31 (4H, d,  $J$  = 5.25 Hz, pyridinium-H), 8.79 (4H, d,  $J$  = 5.13 Hz, pyridinium-H), 4.45 (6H, s, CH<sub>3</sub>);  $^{13}\text{C}$  NMR (DMSO, 75 MHz, ppm):  $\delta$  148.0, 146.5, 126.0, 48.0.

### 3.6 Synthesis of TV

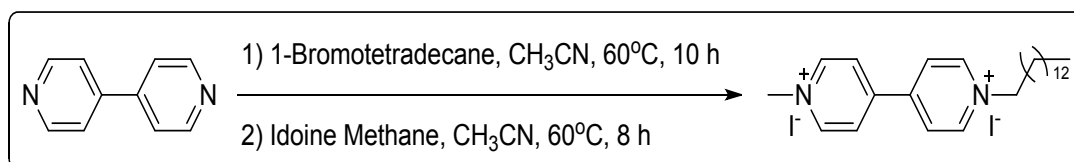

The synthesis was carried as ref[3] to afford a red powder. ESI-MS (+):  $m/z$  = 368;  $^1\text{H}$  NMR (DMSO, 300 MHz, ppm):  $\delta$  9.39 (2H, d,  $J$  = 9.0 Hz, pyridinium-H), ) : 9.29 (2H, d,  $J$

= 6.0 Hz, pyridinium-H), 8.78 (4H, m, pyridinium-H), 4.69 (2H, t,  $J = 9.0$  Hz,  $\text{NCH}_2$ ), 4.45 (3H, s,  $\text{CH}_3$ ), 1.97 (2H, m,  $\text{CH}_2$ ), 1.23-1.30 (22H, m,  $\text{CH}_2$ ), 0.84 (3H, t,  $J = 6.0$  Hz,  $\text{CH}_3$ );  $^{13}\text{C}$  NMR (DMSO, 75 MHz, ppm):  $\delta$  148.51, 148.17, 146.60, 145.73, 126.58, 126.13, 126.07, 60.89, 48.11, 31.29, 30.77, 29.05, 29.02, 28.95, 28.83, 28.17, 28.44, 25.10, 22.10, 13.98.

### 3.7 Synthesis of 2-AP

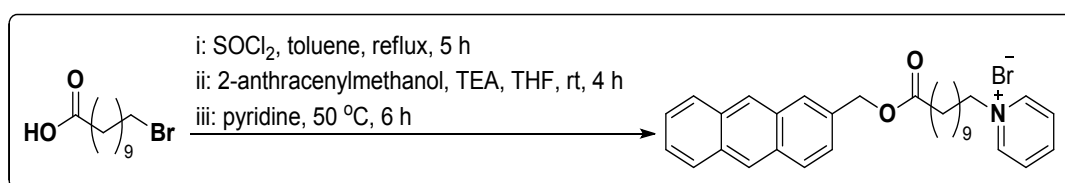

The synthesis of **2-AP** was carried out as ref [4]. MS-ESI (+):  $m/z = 454$ ;  $^1\text{H}$  NMR (300 MHz, DMSO,  $\delta$ ppm): 9.11 (2H, d,  $J = 6.9$  Hz, pyridinium-H), 8.60 (1H, t,  $J = 7.2$  Hz, pyridinium-H), 8.57 (1H, s, anthracene-H), 8.56 (1H, s, anthracene-H), 8.15 (2H, dd,  $J_1 = 7.2$  Hz,  $J_2 = 6.9$  Hz, pyridinium-H), 8.07 (4H, m, anthracene-H), 7.50 (3H, m, anthracene -H), 5.28 (2H, s,  $\text{OCH}_2$ ), 4.57 (2H, t,  $J = 7.5$  Hz,  $\text{NCH}_2$ ), 2.39 (2H, t,  $J = 7.2$  Hz,  $\text{CH}_2\text{CO}$ ), 1.84 (2H, m,  $\text{CH}_2$ ), 1.54 (2H, m,  $\text{CH}_2$ ), 1.19 (12H, m,  $\text{CH}_2$ );  $^{13}\text{C}$  NMR (75 MHz, DMSO,  $\delta$ ppm): 173.33 (C=O), 145.91, 145.16, 128.92 (5C, pyridinium-C), 133.86, 131.88, 131.81, 131.18, 131.07, 128.51, 128.46, 127.06, 126.59, 126.42, 126.19, 126.16, 126.02 (14C, anthracene-C), 65.95, 61.12, 33.95, 31.15, 29.16, 29.11, 29.05, 28.85, 28.76, 25.78, 24.93.

## 4. Preparation of TMV (wt)-Alkyne and TMV (wt)-PYR

### 4.1 TMV(wt)-Alkyne

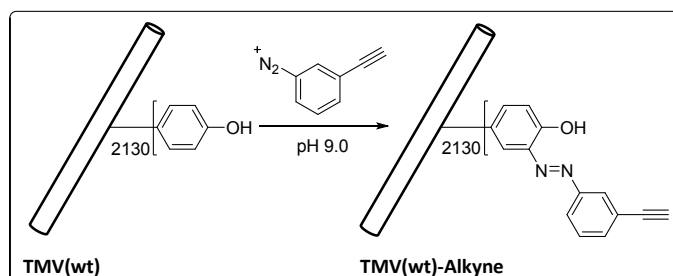

An aqueous of sodium nitrite (50  $\mu\text{L}$ , 207 mg/mL) was added to the premixed solutions of *p*-toluene sulfonic acid (800  $\mu\text{L}$ , 0.3 mol/L) in water and 3-aminophenyl acetylene (150  $\mu\text{L}$ , 78 mg/mL) in acetonitrile. The mixture was incubated at 0  $^{\circ}\text{C}$  for 1 h in dark place. After that, diazonium salt (608  $\mu\text{L}$ , 12.9 mg/mL) was added to the solution of TMV (wt) (1.28 mL, 35 mg/mL) in borate buffer (13.10 mL, 0.1 M, pH = 9.0), and the mixture was incubated at 0  $^{\circ}\text{C}$  for 2 hours in a dark place. The modified virus sample was purified by 40% (w/w) sucrose gradient ultracentrifugation using a Beckman Optima<sup>TM</sup> L90K Ultracentrifuge. After, the pellet was dissolved in Kphos buffer, and characterized by UV-Vis, Fluorescence spectrameter, MALDI-TOF MS, DLS, SDS-PAGE and TEM.

#### 4.2 TMV (wt)-PYR

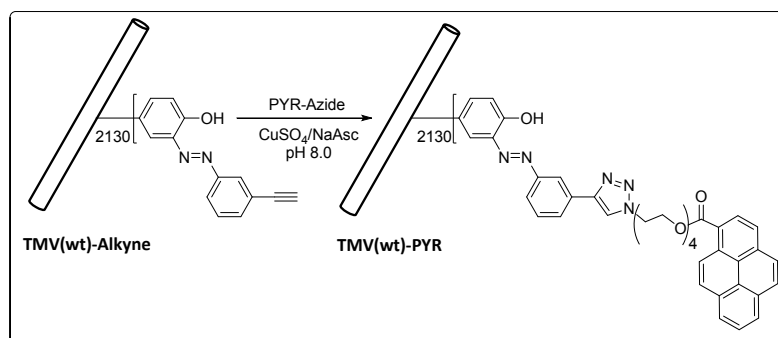

PYR-Azide (200  $\mu\text{L}$ , 0.11 M) in DMSO and TMV (wt)-alkyne (636  $\mu\text{L}$ , 25 mg/mL) were mixed with Tris.HCl buffer (3.08 mL, 10 mM, pH = 8.0), and then the aqueous of CuSO<sub>4</sub> (40  $\mu\text{L}$ , 0.1 M) and NaASC (40  $\mu\text{L}$ , 0.2 M) were added, followed by incubating at room temperature for 18 hours. The modified viruses were purified by 40% (w/w) sucrose gradient centrifugation using a Beckman Optima<sup>TM</sup> L90K Ultracentrifuge. The pellet was dissolved in buffer and characterized by and characterized by UV-Vis, Fluorescence spectrameter, FPLC, MALDI-TOF MS, DLS, SDS-PAGE and TEM.

## 5. Figure S1-S27

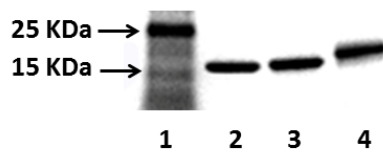

**Figure S1.** SDS-PAGE: lane 1, protein markers; lane 2, **TMV(wt)**; lane 3, **TMV(wt)-Alkyne**; lane 4, **TMV(wt)-PYR**.

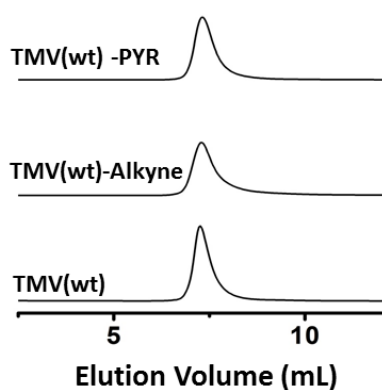

**Figure S2.** SEC diagram of **TMV(wt)**, **TMV(wt)-Alkyne**, and **TMV(wt)-PYR** monitored at 260 nm.

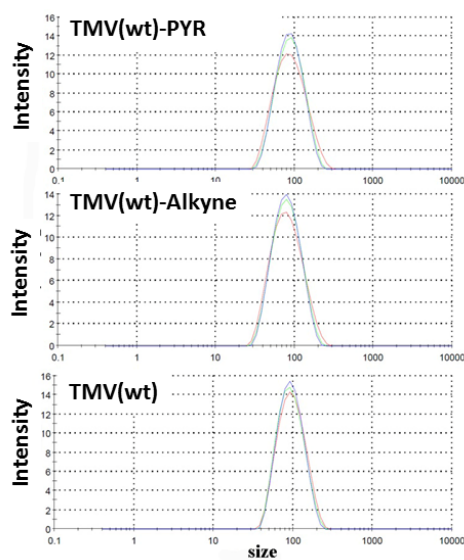

**Figure S3.** DLS of **TMV(wt)**, **TMV(wt)-Alkyne**, and **TMV(wt)-PYR**



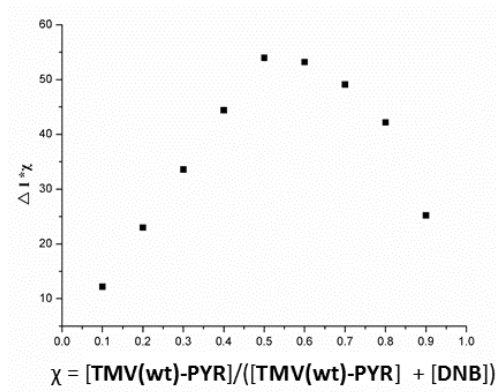

**Figure S4.** Job's plot showing 1:1 complex formation for **TMV(wt)-PYR/DNB**.

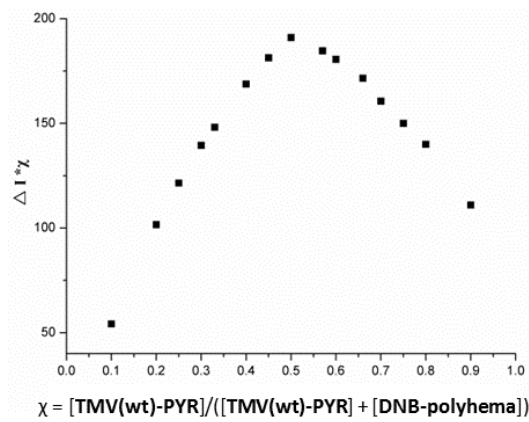

**Figure S5.** Job's plot showing 1:1 complex formation for **TMV(wt)-PYR/DNB-polyhema**.

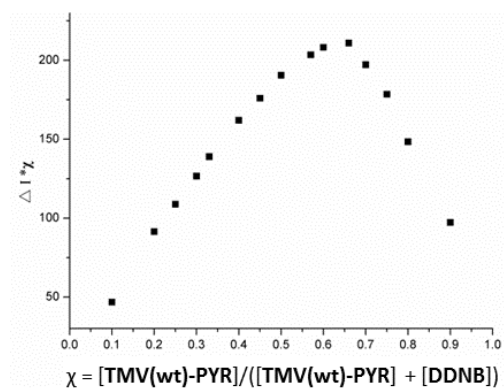

**Figure S6.** Job's plot showing 2:1 complex formation for **TMV(wt)-PYR/DDNB**.

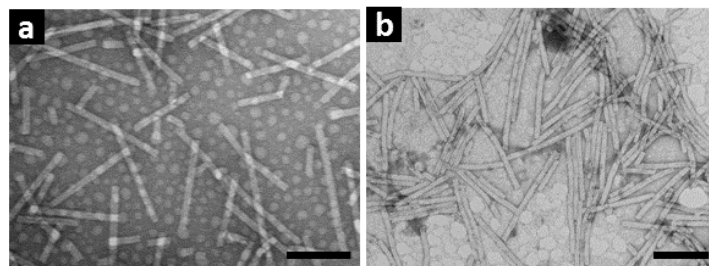

**Figure S7.** TEM image of uranyl acetate-stained (a) **TMV(wt)-PYR/DNB** (1:1, molar ratio), and (b) **TMV(wt)-PYR/MV/CB[8]** (1:1:1, molar ratio). The scale bar is 300 nm.

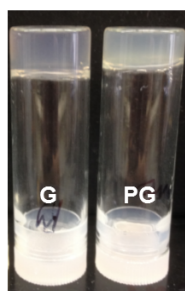

**Figure S8.** Photographies of **TMV(wt)-PYR** (left) and **TMV(wt)** (right)-based hydrogel with **2-AP**, respectively. For the hydrogel preparation: **TMV(wt)-PYR** (0.12 mg/mL) was premixed with **2-AP** (3 mg/mL) in Kphos buffer (pH=7.8), and then the mixture was heated to 45 °C. After cooling to room temperature, the hydrogel formed.

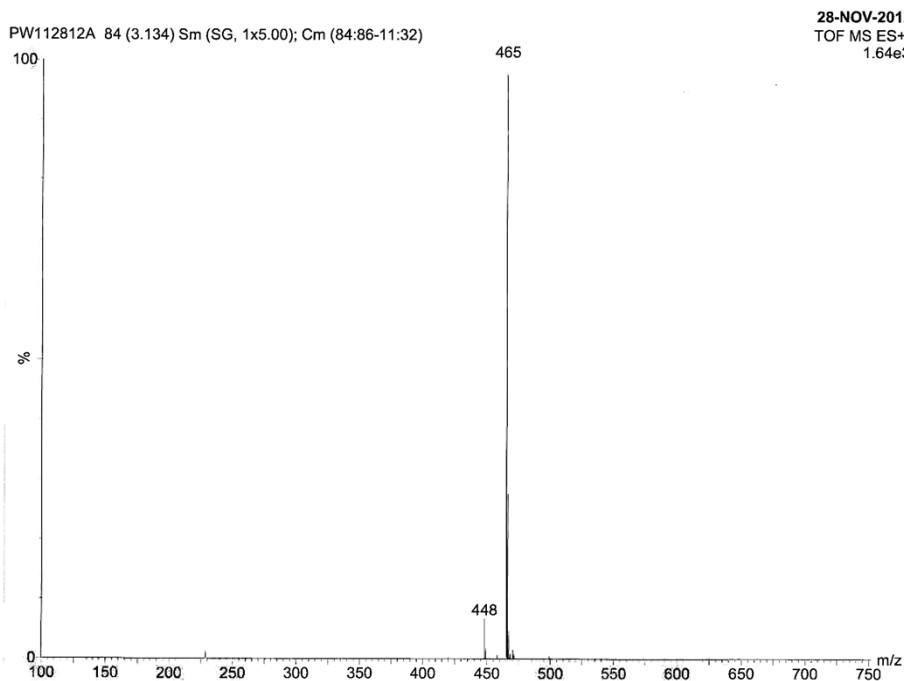

**Figure S9.** ESI-MS (+) Spectrum of **PYR-Azide**

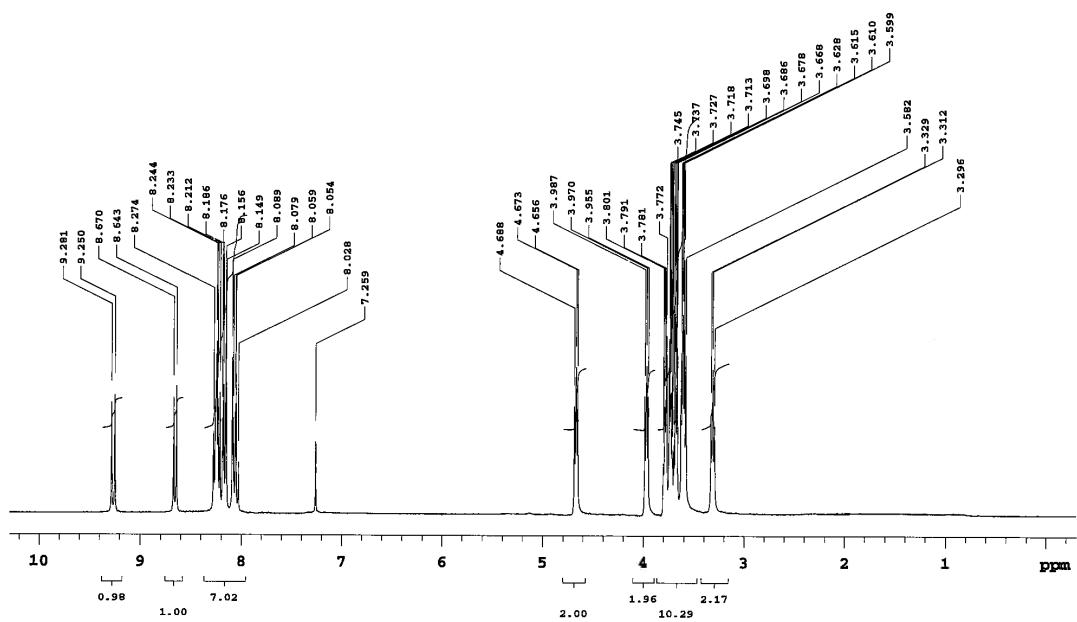

Figure S10.  $^1\text{H}$  NMR Spectrum ( $\text{CDCl}_3$ , 300 MHz) of PYR-Azide

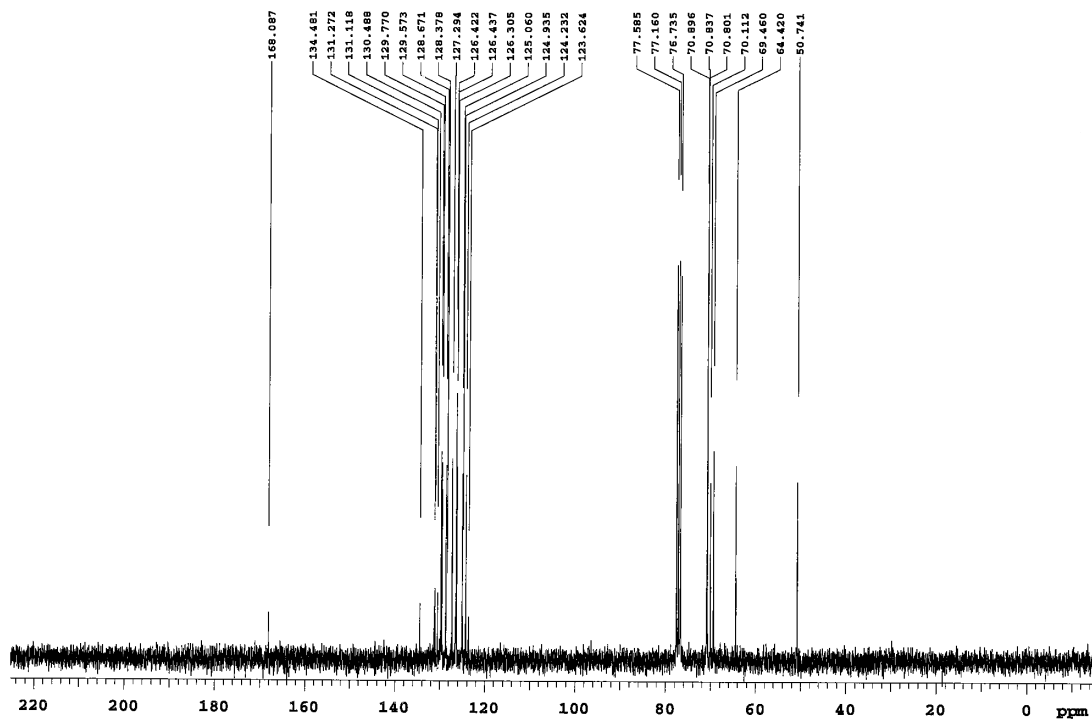

Figure S11.  $^{13}\text{C}$  NMR Spectrum ( $\text{CDCl}_3$ , 75 MHz) of PYR-Azide

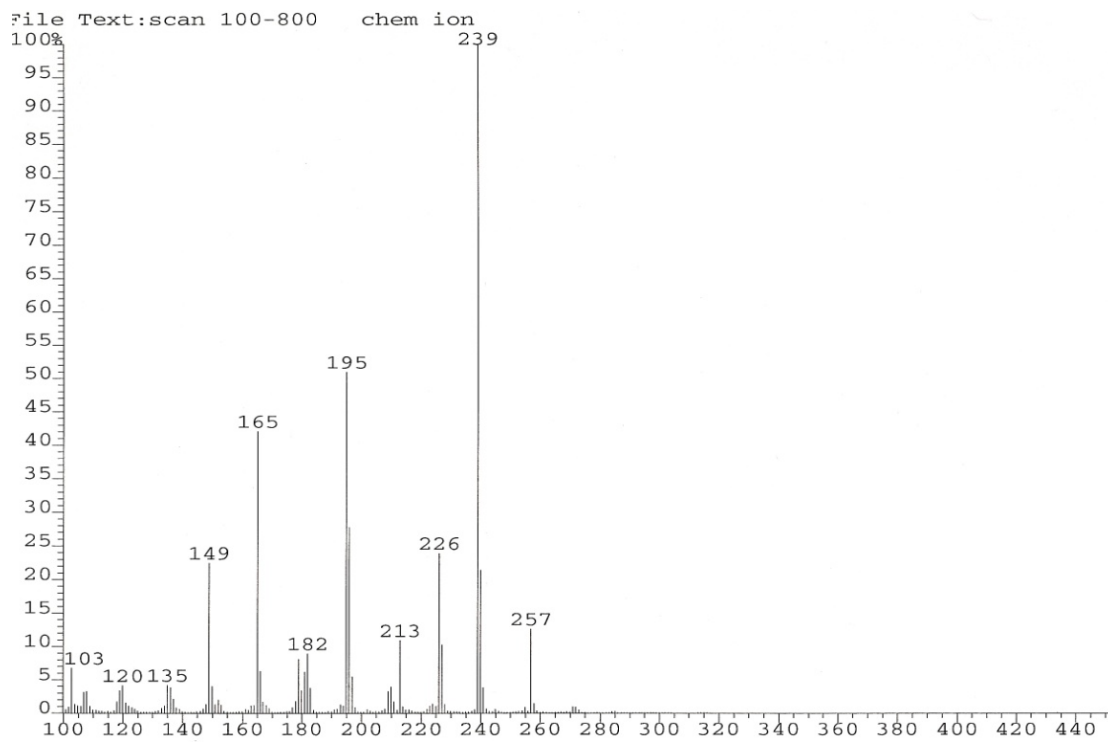

Figure S12. EI-MS (+) Spectrum of DNB

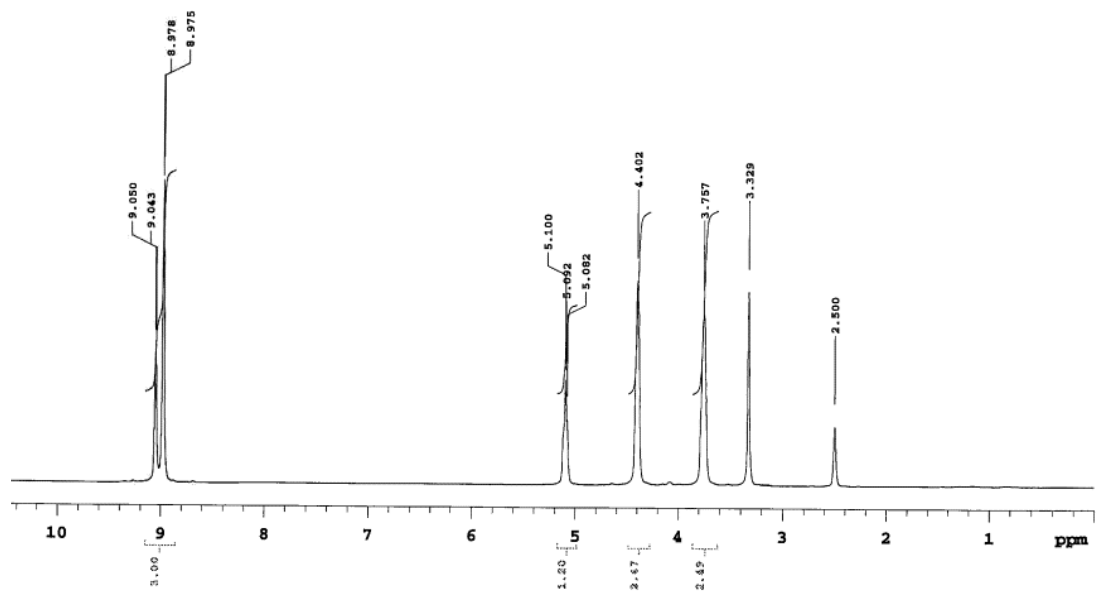

Figure S13.  $^1\text{H}$  NMR Spectrum (DMSO, 300 MHz) of DNB

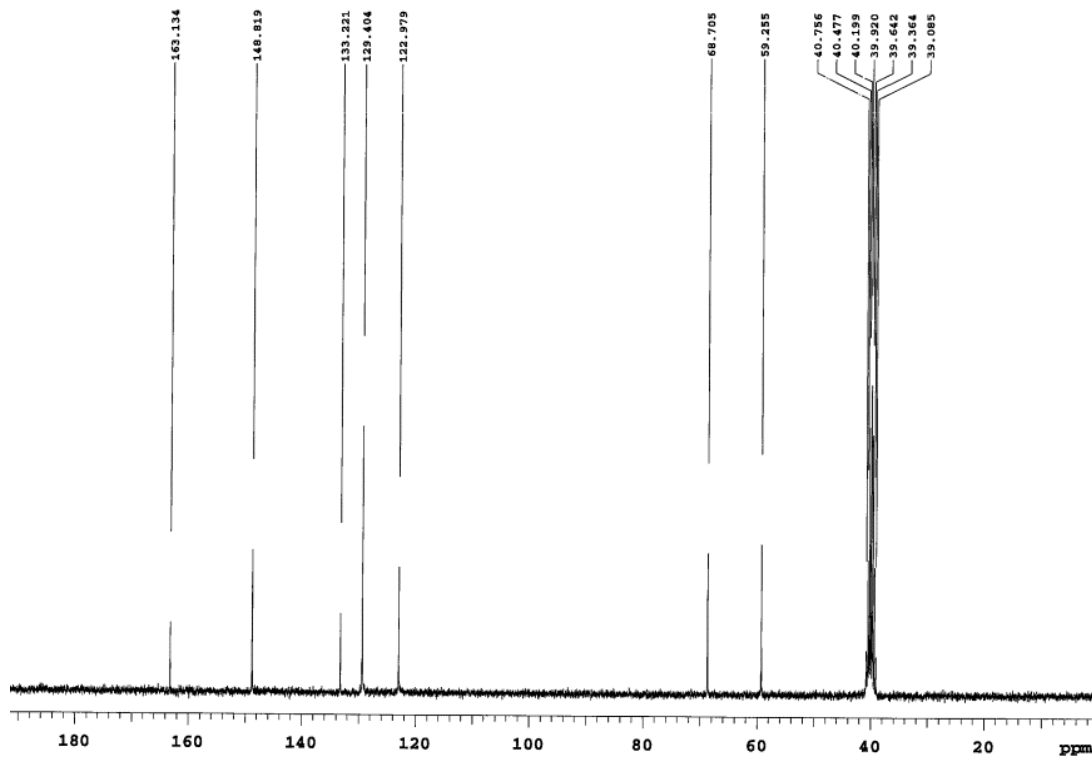

Figure S14.  $^{13}\text{C}$  NMR Spectrum (DMSO, 75 MHz) of DNB

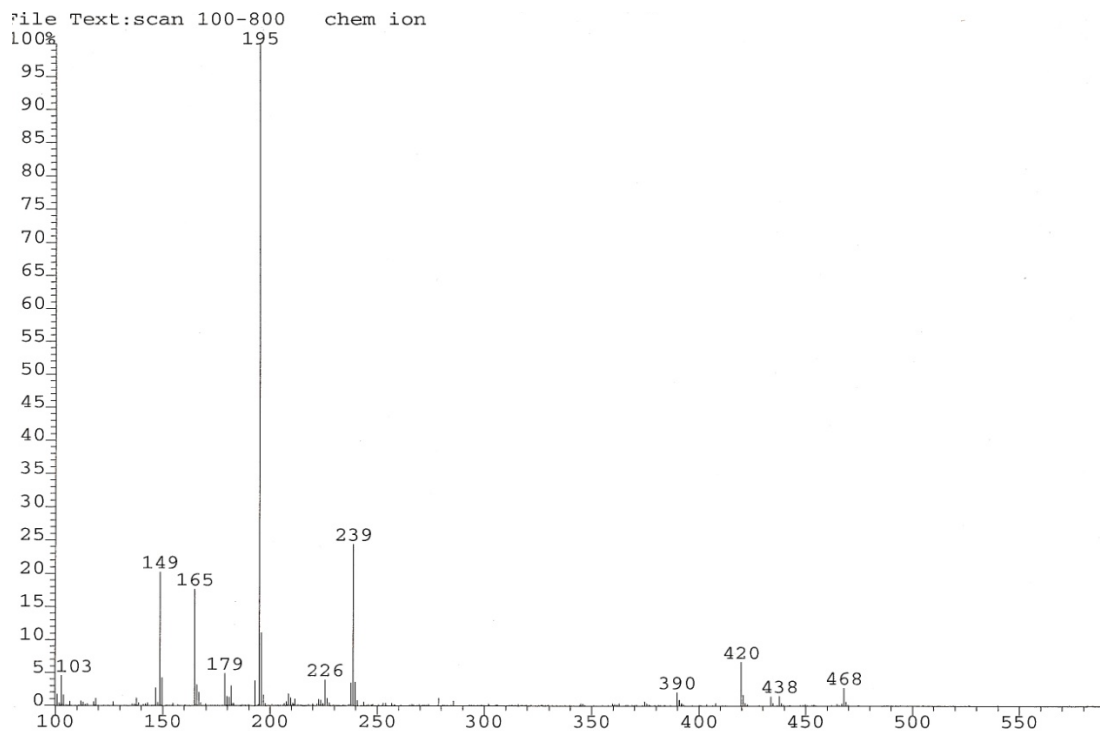

Figure S15. EI-MS (+) Spectrum of DDNB

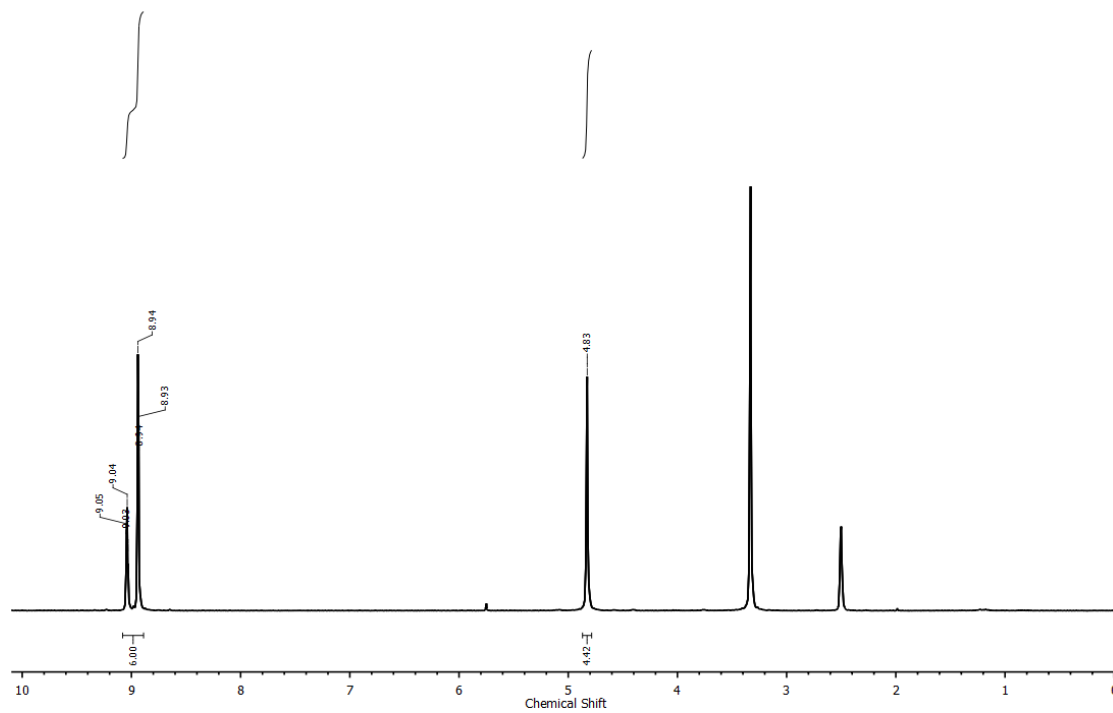

**Figure S16.**  $^1\text{H}$  NMR Spectrum (DMSO, 300 MHz) of **DDNB**

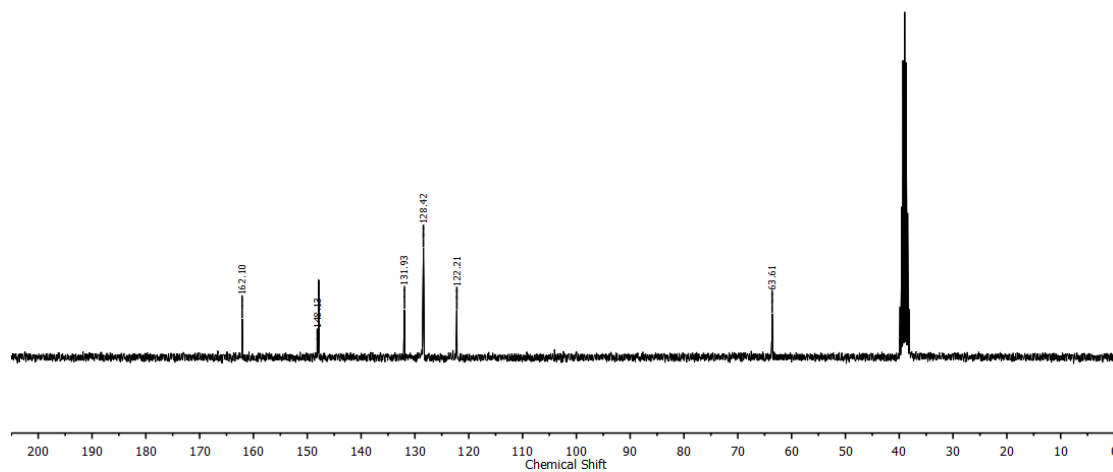

**Figure S17.**  $^{13}\text{C}$  NMR Spectrum (DMSO, 75 MHz) of **DDNB**

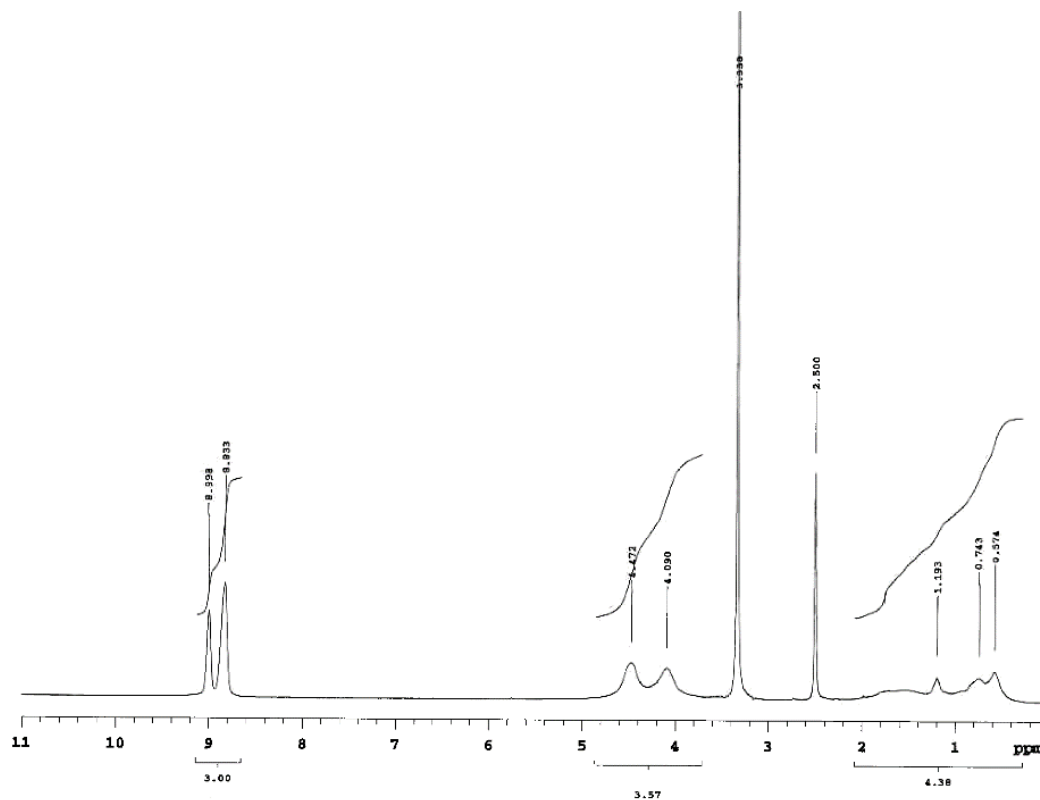

Figure S18. <sup>1</sup>H NMR Spectrum (DMSO, 300 MHz) of DNB-Polyhema

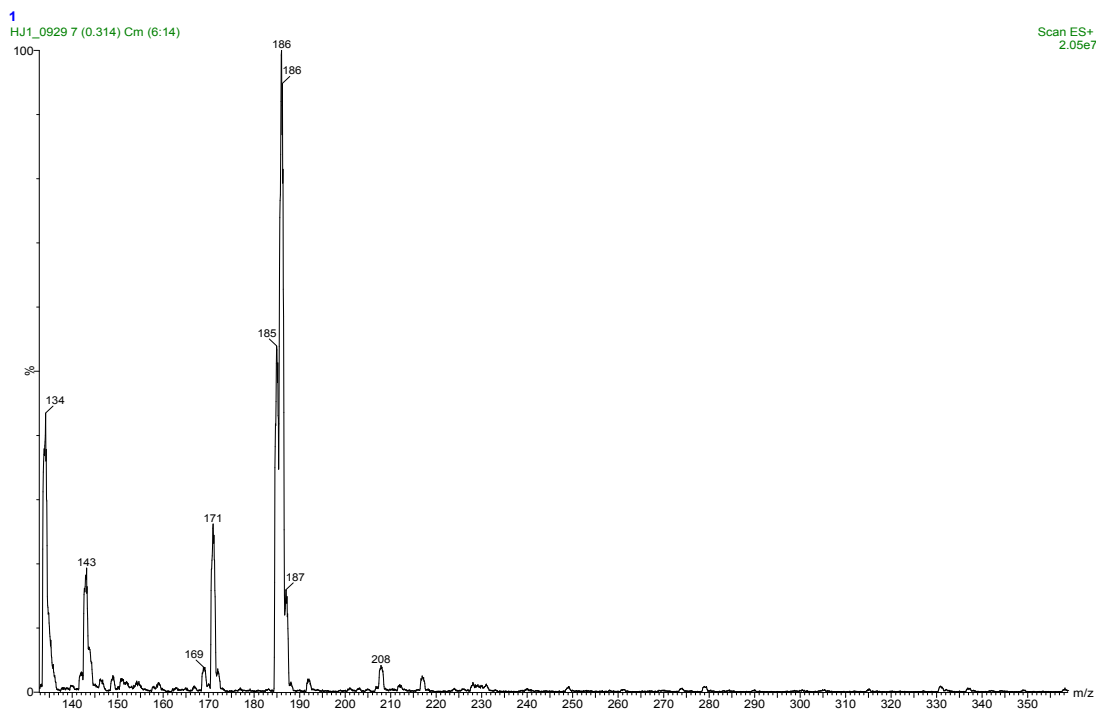

Figure S19. EI-MS (+) Spectrum of MV

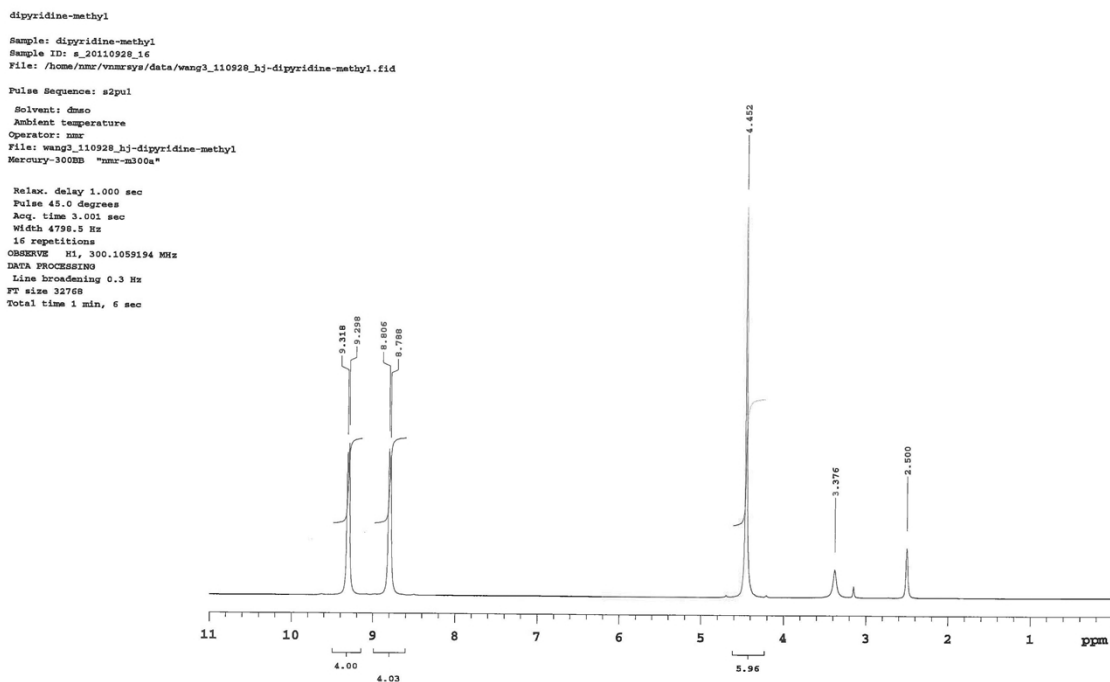

Figure S20.  $^1\text{H}$  NMR Spectrum (DMSO, 300 MHz) of MV

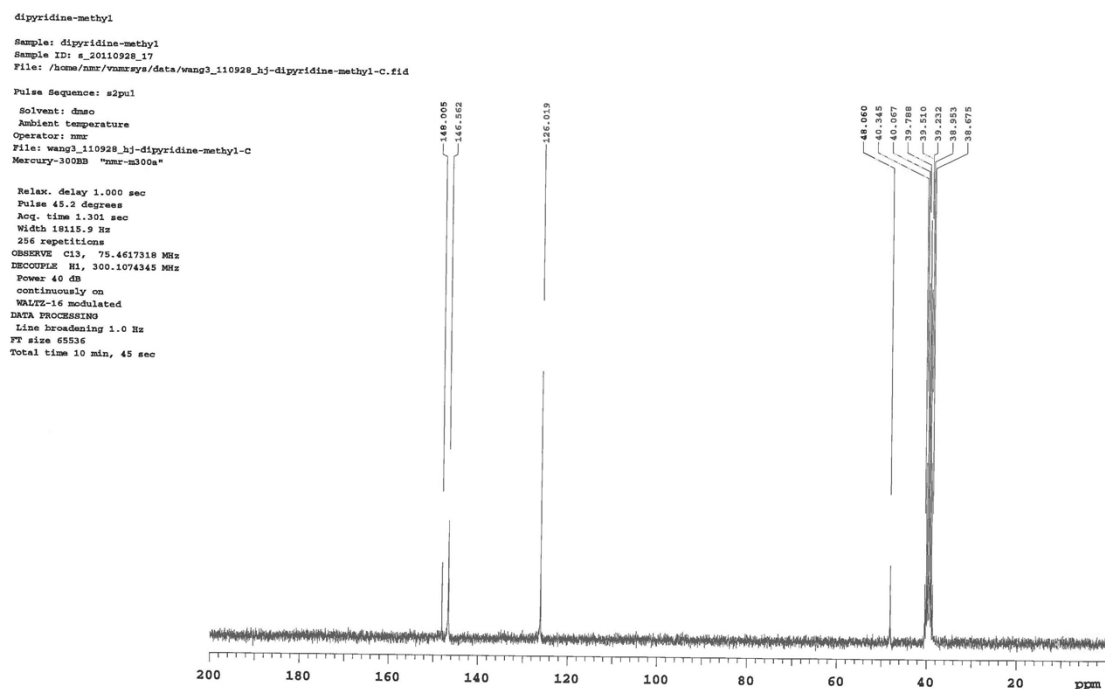

Figure S21.  $^{13}\text{C}$  NMR Spectrum (DMSO, 75 MHz) of MV



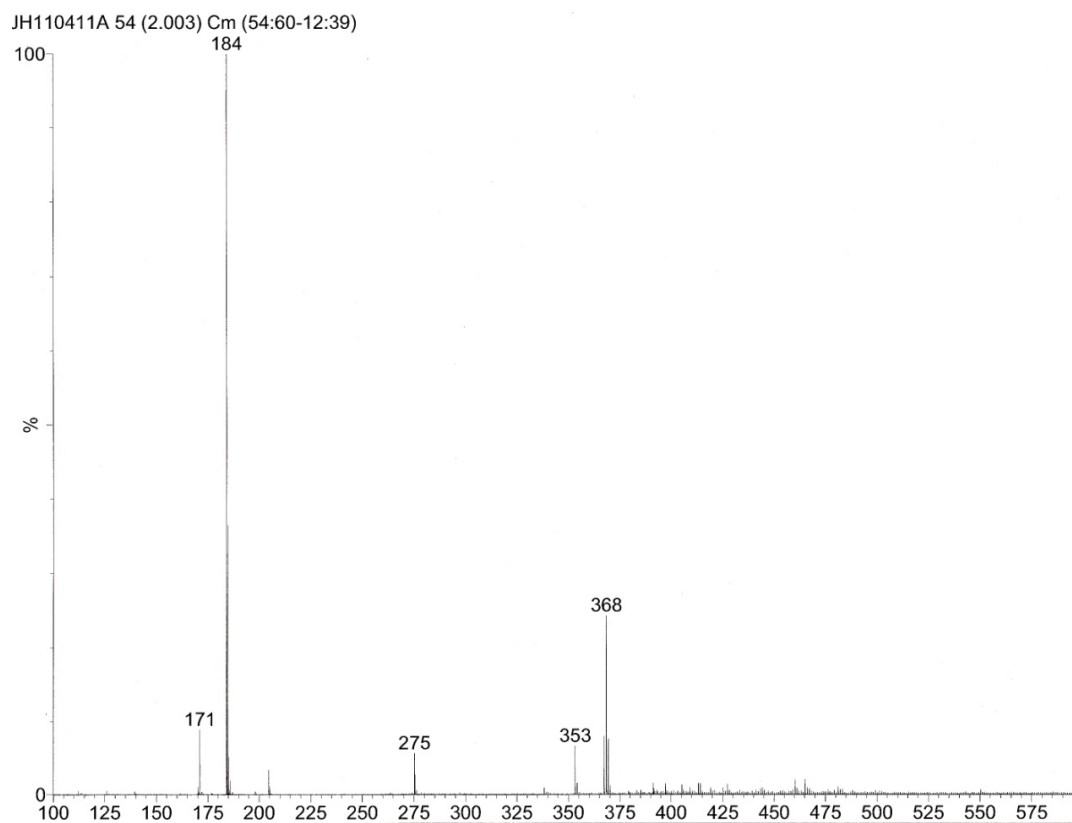

**Figure S22.** ESI-MS (+) Spectrum of TV

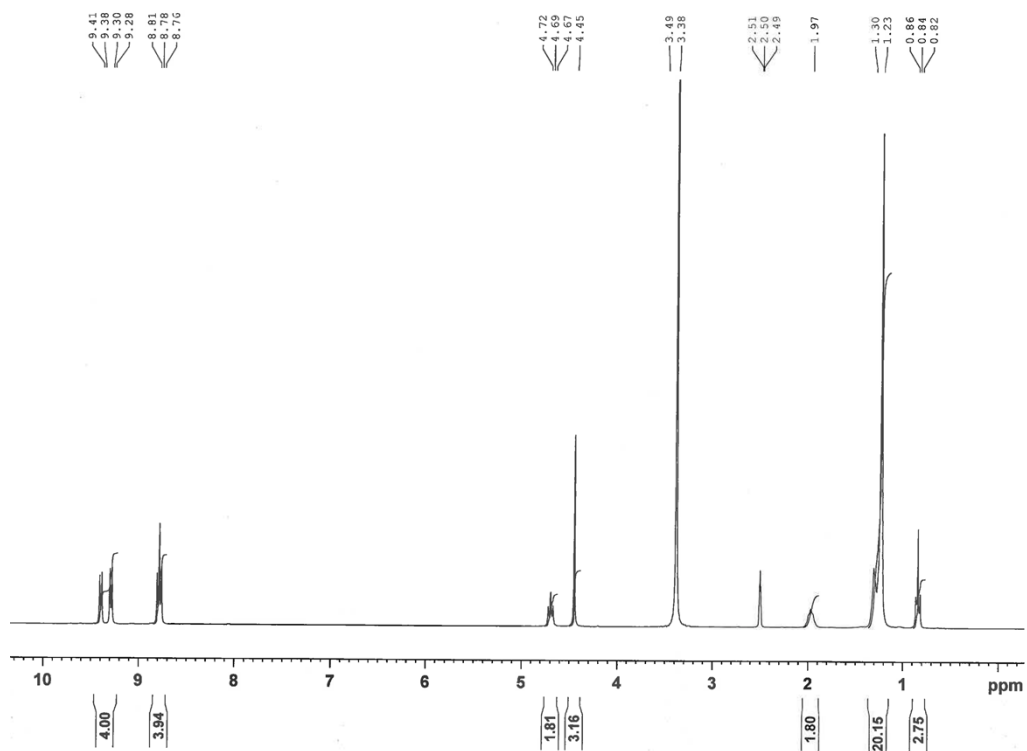

**Figure S23.**  $^1\text{H}$  NMR Spectrum (DMSO, 300 MHz) of TV

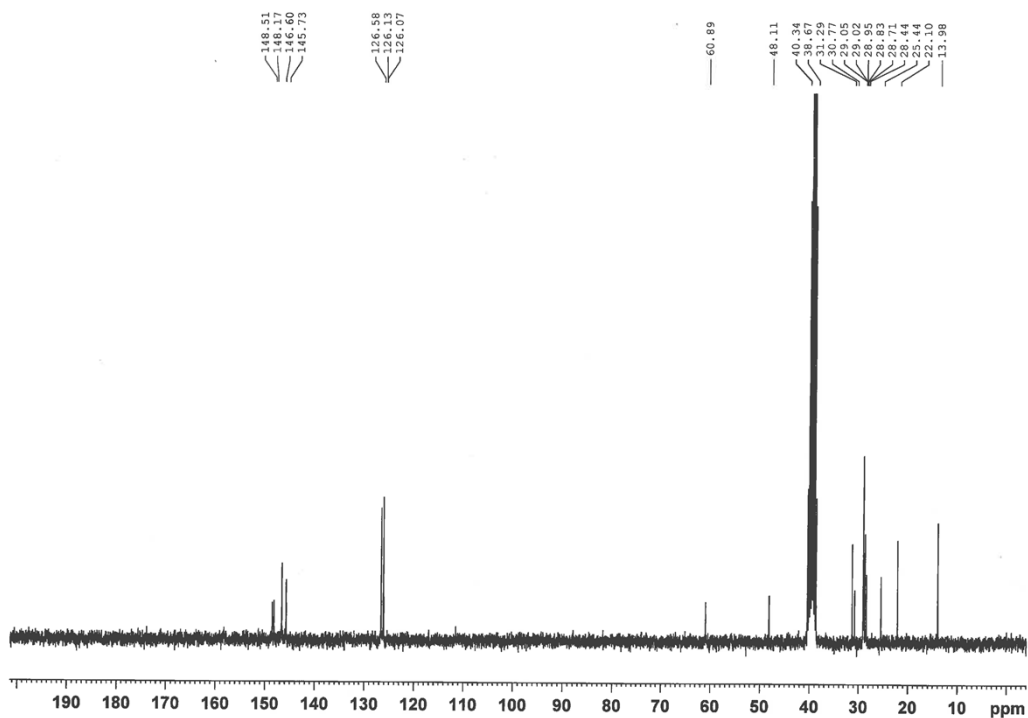

Figure S24.  $^{13}\text{C}$  NMR Spectrum (DMSO, 75 MHz) of TV

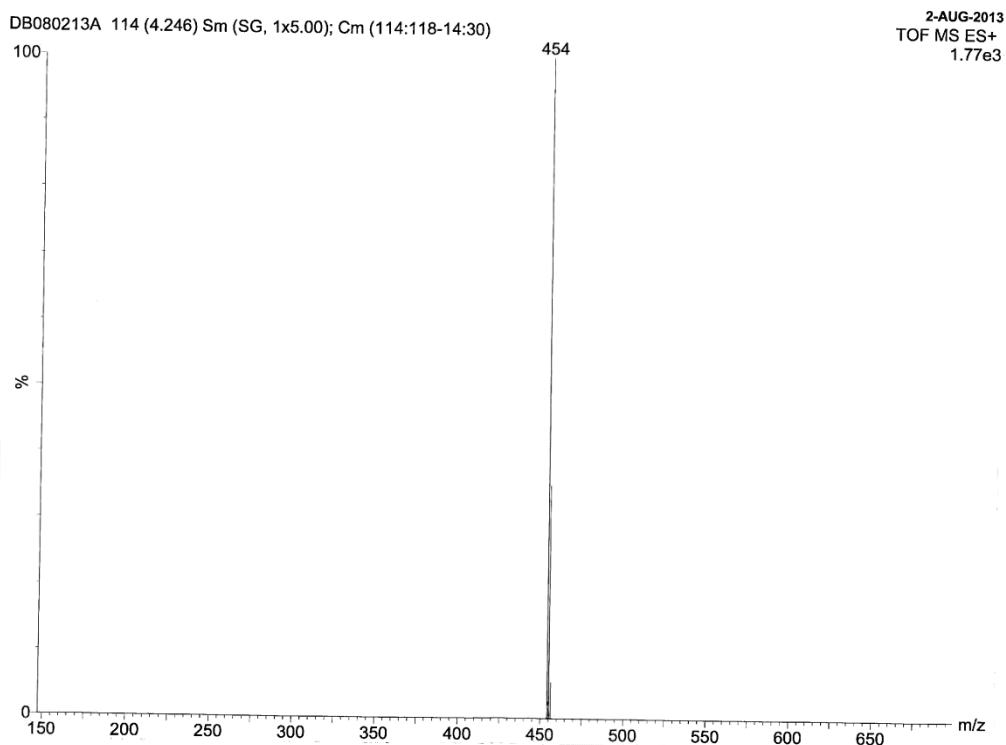

Figure S25. ESI-MS (+) Spectrum of 2-AP

Sample ID: s\_20130810\_03  
 File: 0045.fid  
 Pulse Sequence: s2pul  
 Solvent: dmsc  
 Ambient temperature  
 Operator: nmr  
 File: 0045  
 Mercury-300MB "nmr-m300a"  
 Relax. delay 1.000 sec  
 Pulse 45.0 degrees  
 Acq. time 0.001 sec  
 Width 4798.5 Hz  
 16 repetitions  
 OBSERVE H1, 300.1059188 MHz  
 DATA PROCESSING  
 Line broadening 0.3 Hz  
 FT size 32768  
 Total time 1 min, 6 sec

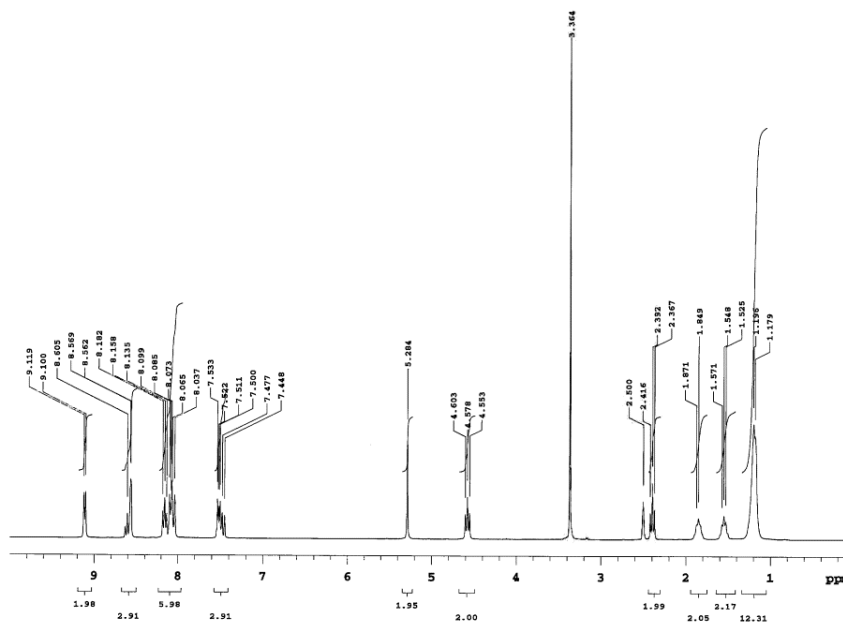

Figure S26. <sup>1</sup>H NMR Spectrum (DMSO, 300 MHz) of 2-AP

Sample ID: s\_20130810\_04  
 File: 0046.fid  
 Pulse Sequence: s2pul  
 Solvent: dmsc  
 Ambient temperature  
 Operator: nmr  
 File: 0046  
 Mercury-300MB "nmr-m300a"  
 Relax. delay 1.000 sec  
 Pulse 45.2 degrees  
 Acq. time 1.301 sec  
 Width 18115.9 Hz  
 512 repetitions  
 OBSERVE C13, 75.4616947 MHz  
 DECOUPLE H1, 300.1074345 MHz  
 Power 41 dB  
 continuously on  
 WALTZ-16 modulated  
 DATA PROCESSING  
 Line broadening 1.0 Hz  
 FT size 65536  
 Total time 21 min, 31 sec

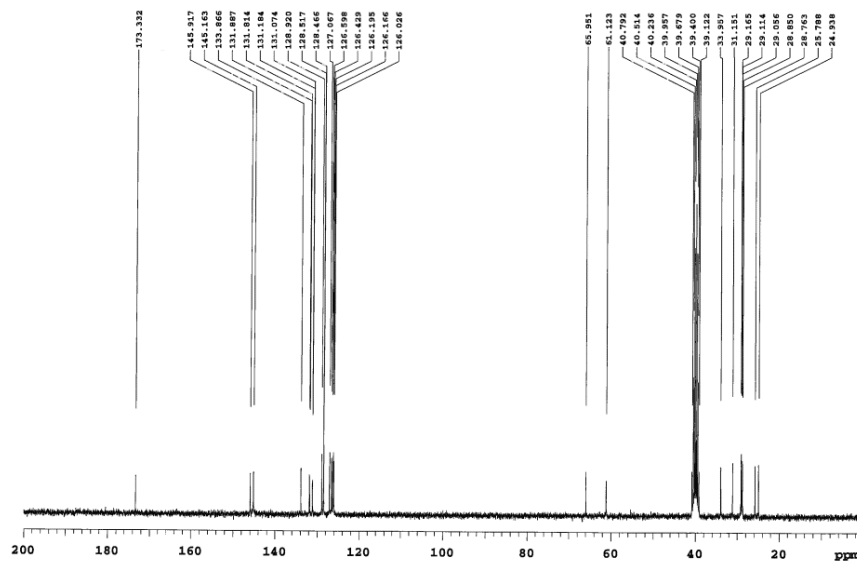

Figure S27. <sup>13</sup>C NMR Spectrum (DMSO, 75 MHz) of 2-AP

## 6. References

1. Wang, C.; Yin, S.; Chen, S.; Xu, H.; Wang, Z.; Zhang, X. Controlled self-assembly manipulated by charge transfer interaction: from tubes to vesicles. *Angew. Chem. Int. Ed.*, 2008, **47**, 9049-9052.

2. Li, H.; Chen, D.; Sun, Y.; Zheng, Y.; Tan, L.; Weiss, P. S.; Yang, Y. Viologen-Mediated Assembly of and Sensing with Carboxylatopillar[5]arene-Modified Gold Nanoparticles. *J. Am. Chem. Soc.*, 2013, **135**, 1570-1576.
3. Wang, C.; Guo, Y.; Wang, Z.; Zhang, X. Superamphiphiles Based on Charge Transfer Complex: Controllable Hierarchical Self-Assembly of Nanoribbons. *Langmuir*, 2010, **26**, 14509-14511.
4. Hu, J.; Wang, P.; Lin, Y.; Zhang, J.; Smith, M.; Pellechia, P. J.; Yang, S.; Song, B.; Wang, Q. Self-Assembly of Pyridinium-Functionalized Anthracenes: Molecular-Skeleton-Directed Formation of Microsheets and Microtubes *Chem. Eur. J.* 2014, **20**, 7603-7607.
